# Supplementary material for: The core–shell structure of PNIPAM collapsed chain conformation induces a bimodal transition on cooling
Source: Royal Society of Chemistry journal article supplement (doi:10.1039/c3sm27761e), 2013-01-01
Supplement: c3sm27761e.pdf [file c3sm27761e.pdf]

## Supporting Information

# The Core-shell Structure of PNIPAM Chain Collapsed Conformation Induces a Bimodal Transition in Cooling

Hengjie Lai<sup>a</sup>, Qianjin Chen<sup>b</sup> and Peiyi Wu<sup>\*a</sup>

<sup>a</sup>State Key Laboratory of Molecular Engineering of Polymer, Department of Macromolecular Science and Laboratory of Advanced Materials, Fudan University, Shanghai 200433, People's Republic of China. <sup>b</sup>Department of Chemistry, The Chinese University of Hong Kong, Shatin, N.T., Hong Kong

E-mail: peiyiwu@fudan.edu.cn

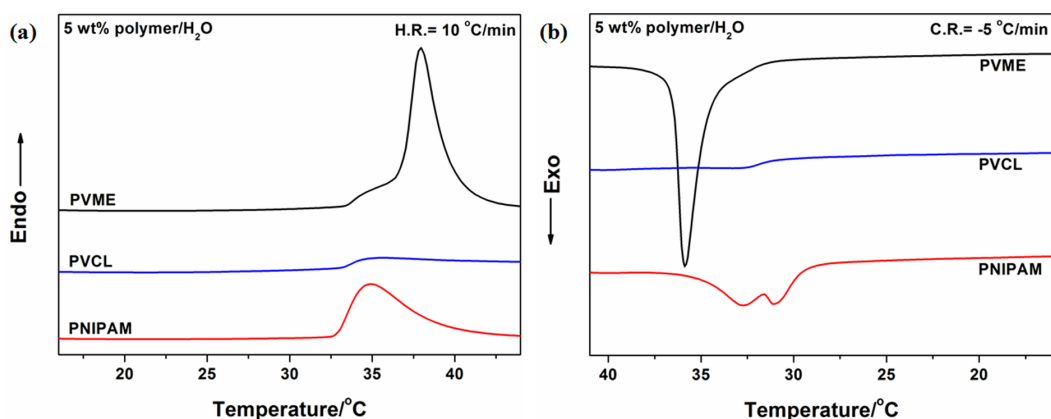

Figure S1. DSC curves of PVME (Mw=6500), PVCL (Mw=5600) and S5 PNIPAM during (a) heating and (b) cooling processes. All sample concentrations are 5 wt%. Heating rate is 10 °C/min and cooling rate is -5 °C/min.
